# Supplementary material for: Facial Mimicry and Emotion Consistency: Influences of Memory and Context
Source: PLOS journal article supplement (doi:10.1371/journal.pone.0145731), 2015-12-23
Supplement: S1 (10.1371/journal.pone.0145731.s001) [file journal.pone.0145731.s001]

**S1 Table. Trust rating stage data.** Means, standard errors and standard deviations for ratings of trustworthiness according to face expression consistency and time of rating (either Pre, or Post Implicit learning stage).

| Time | Consistency  | Mean   | SE   | SD    |
|------|--------------|--------|------|-------|
| Pre  | Consistent   | -0.01  | 5.42 | 28.68 |
|      | Inconsistent | -0.84  | 4.83 | 25.57 |
| Post | Consistent   | -2.17  | 5.74 | 30.38 |
|      | Inconsistent | -13.75 | 5.01 | 26.52 |
