# Supplementary material for: Facial Mimicry and Emotion Consistency: Influences of Memory and Context
Source: PLOS journal article supplement (doi:10.1371/journal.pone.0145731), 2015-12-23
Supplement: S2 (10.1371/journal.pone.0145731.s002) [file journal.pone.0145731.s002]

**S2 Table. Implicit learning stage behavioural data.** Means, standard errors and standard deviations for scene classification trials in the Implicit learning stage.

| Measure   | Consistency  | Scene    | Mean | SE    | SD     |
|-----------|--------------|----------|------|-------|--------|
| RT (ms)   | Consistent   | Negative | 919  | 41.08 | 213.46 |
|           |              | Positive | 936  | 44.29 | 230.16 |
|           | Inconsistent | Negative | 959  | 40.55 | 210.70 |
|           |              | Positive | 1014 | 44.57 | 231.60 |
| Error (%) | Consistent   | Negative | 1.85 | 0.66  | 3.44   |
|           |              | Positive | 1.85 | 0.61  | 3.15   |
|           | Inconsistent | Negative | 3.52 | 1.41  | 7.31   |
|           |              | Positive | 4.44 | 1.29  | 6.70   |

Data is shown according to scene valence and expression consistency pairings. Reported measures include reaction time (RT) data measured in ms, and error response data reported as a % of trials.
